# Supplementary material for: Preparation and Characterization of Semi-IPN Cryogels Based on Polyacrylamide and Poly(N,N-dimethylaminoethyl methacrylate); Functionalization of Carrier with Monochlorotriazinyl-β-cyclodextrin and Release Kinetics of Curcumin
Source: MDPI journal article supplement (doi:10.3390/molecules26226975), 2021-11-18
Supplement: s1 [file s1]

*Supplementary Material*

# Preparation and Characterization of Semi-IPN Cryogels Based on Polyacrylamide and Poly(*N,N*-dimethylaminoethyl methacrylate); Functionalization of Carrier with Monochlorotriazinyl- $\beta$ -cyclodextrin and Release Kinetics of Curcumin

Ecaterina Stela Dragan \*, Maria Valentina Dinu, Claudiu Augustin Ghiorghita, Maria Marinela Lazar and Florica Doroftei

Department of Functional Polymers, "Petru Poni" Institute of Macromolecular Chemistry, 700487 Iași, Romania; vdinu@icmpp.ro (M.V.D.); claudiu.ghiorghita@icmpp.ro (C.A.G.); mariperju@icmpp.ro (M.M.L.); florica.doroftei@icmpp.ro (F.D.)

\* Correspondence: sdragan@icmpp.ro; Tel.: +40-74-108-8979

**Figure S1.** SEM images of two semi-IPN cryogels prepared by unidirectional freezing in liquid nitrogen having PDMAEMA250 (s-IPN250.5) or PDMAEMA85 (s-IPN85.3) entrapped into PAAm network at a cross-linking ratio of 1:40.

**Figure S2.** FTIR spectra of some semi-IPN cryogels having: (A) PDMAEMA250 (s-IPN250.3 and s-IPN250.4), or (B) PDMAEMA85 entrapped in the PAAm network (sample code is that given in Table 2 in the main text).

**Figure S3.** Calibration curve of CCM in ethanol: pH 3 aqueous solution, 50:50 (v/v).

**Table S1.** Element analysis of two s-IPN composites after the swelling at equilibrium in pH 1.2.

**Table S2.** The mathematical formula of kinetic models.

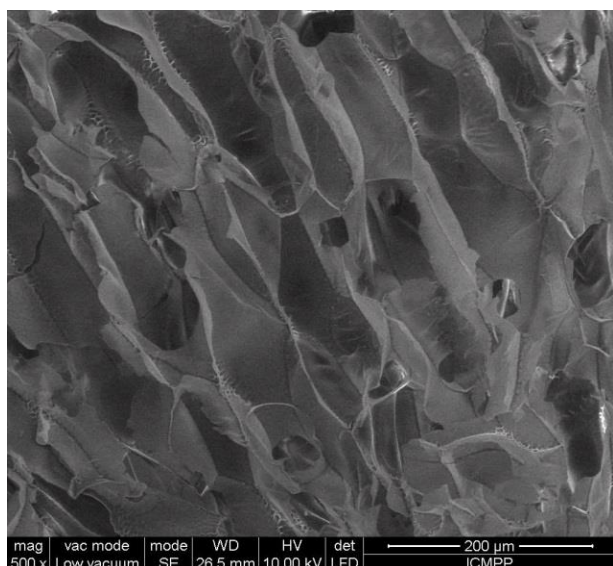

**s-IPN250.5**

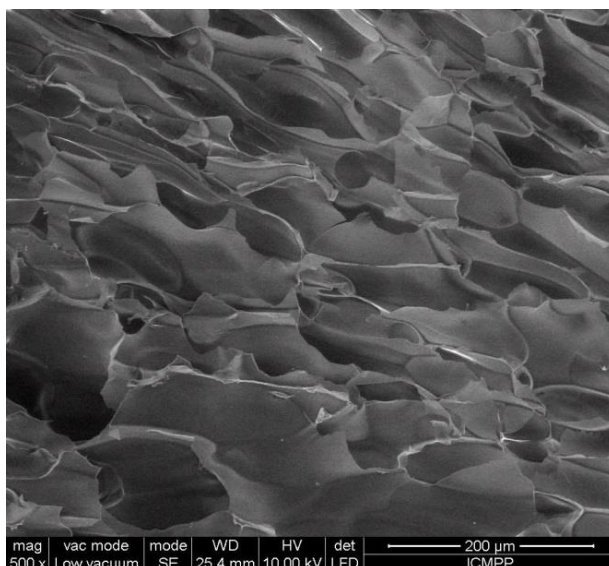

**s-IPN85.3**

**Figure S1.** SEM images of two semi-IPN cryogels prepared by unidirectional freezing in liquid nitrogen having PDMAEMA250 (s-IPN250.5) or PDMAEMA85 (s-IPN85.3) entrapped into PAAm network at a cross-linking ratio of 1:40.

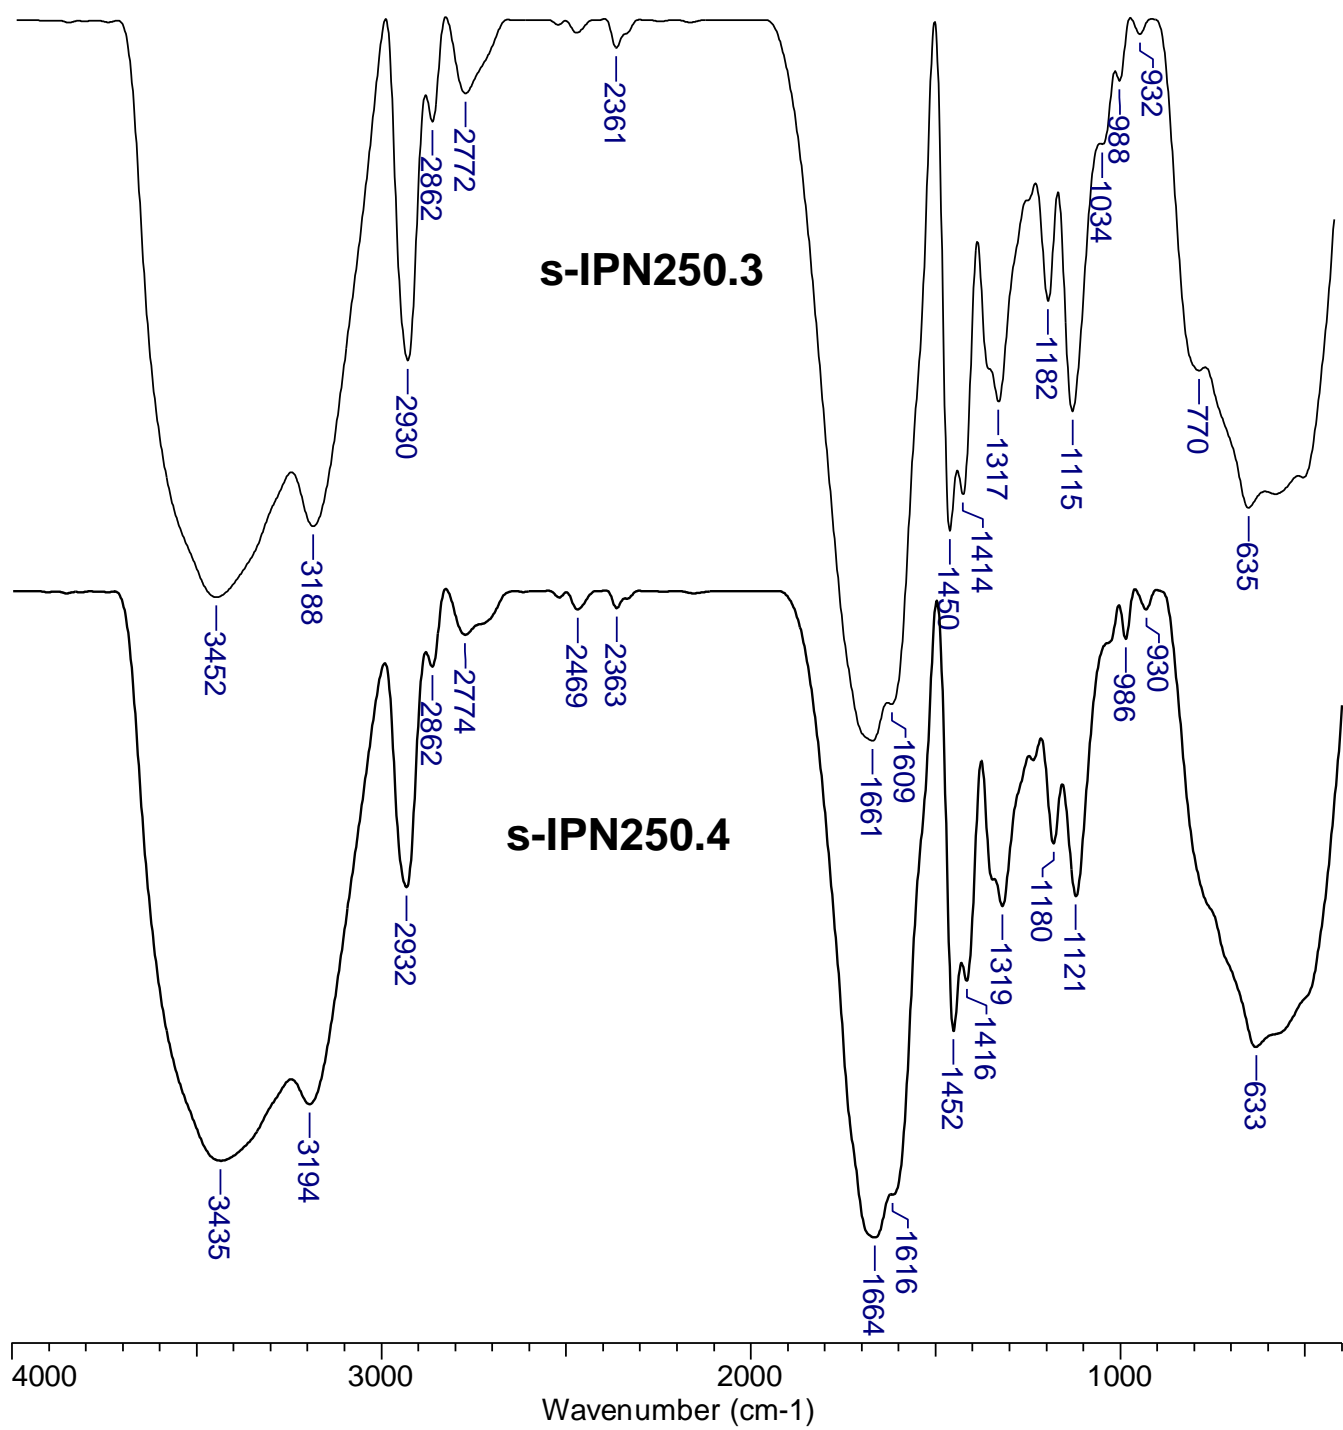

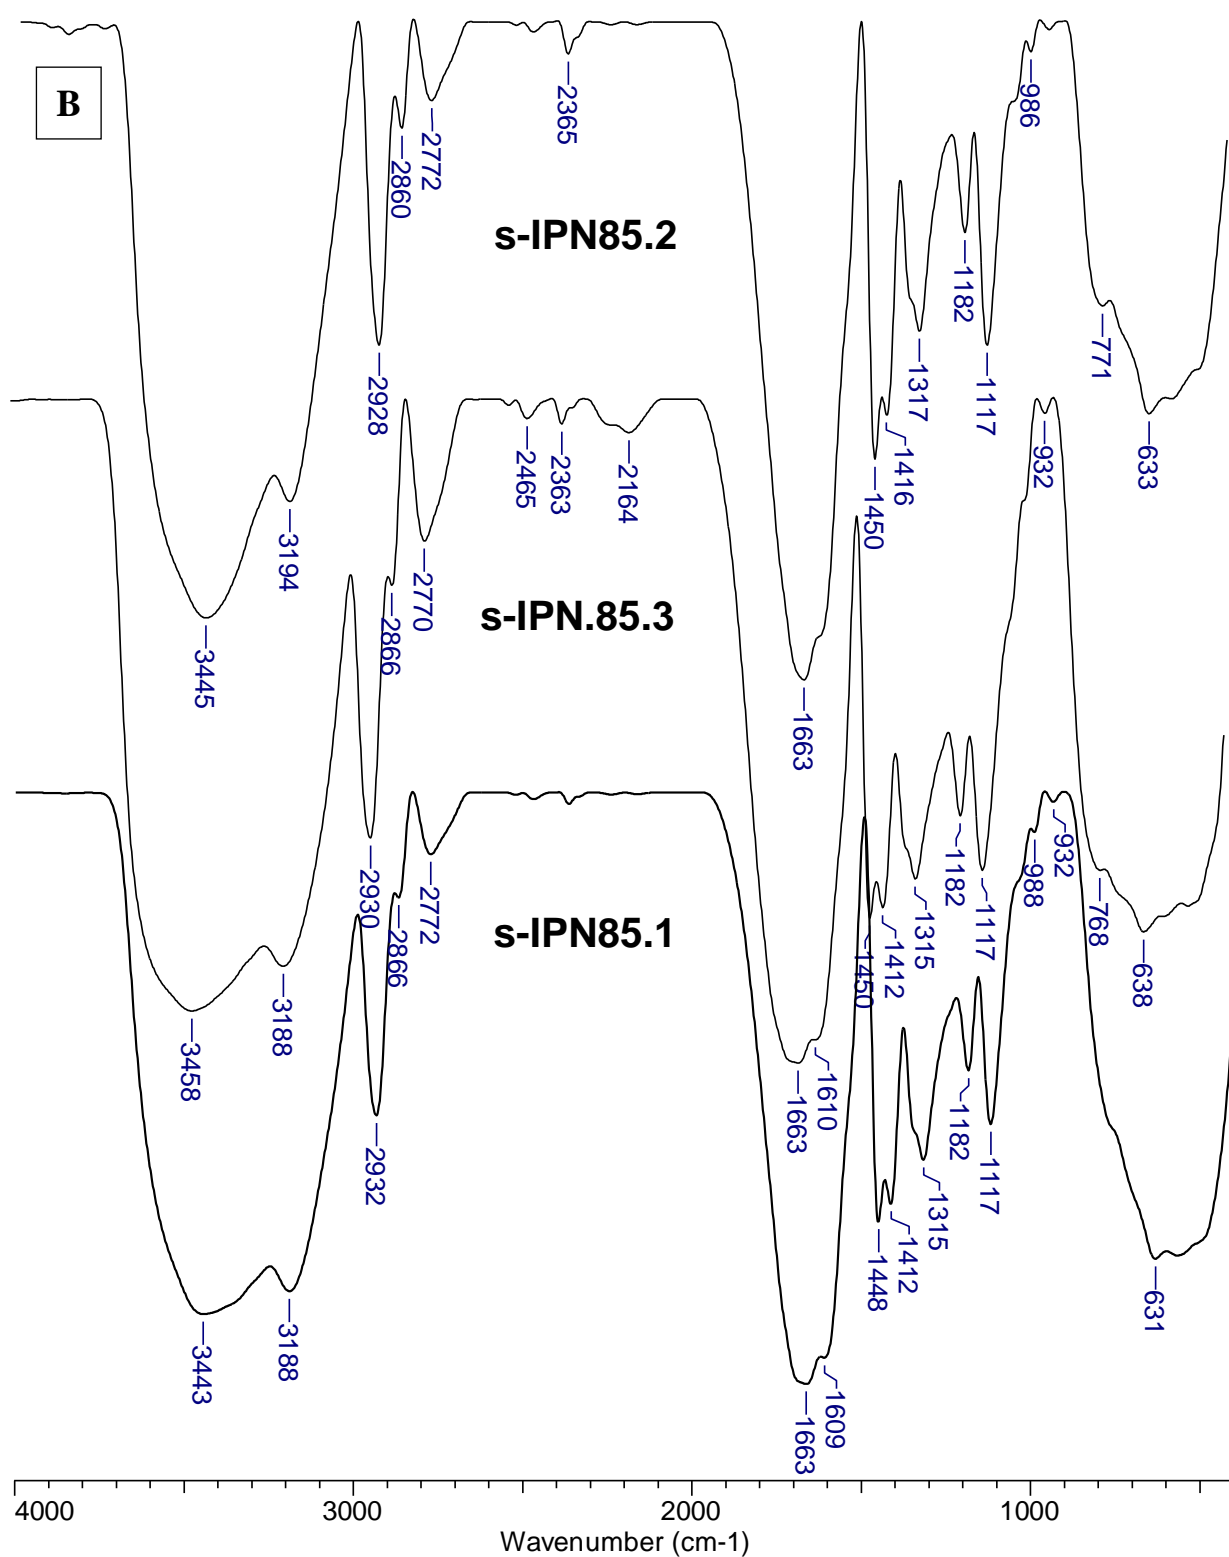

**Figure S2.** FTIR spectra of some semi-IPN cryogels having: (A) PDMAEMA250 (s-IPN250.3 and s-IPN250.4), or (B) PDMAEMA85 entrapped in the PAAm network (sample code is that given in Table 2 in the main text).

**Table S1.** Element analysis of two s-IPN composites after the swelling at equilibrium in pH 1.2.

| Composite  | C %          | N %          | O %          | Cl%         |
|------------|--------------|--------------|--------------|-------------|
| s-IPN250.4 | 49.93 ± 0.79 | 21.64 ± 1.02 | 24.03 ± 1.16 | 2.97 ± 0.85 |
| s-IPN85.3  | 51.26 ± 2.64 | 21.92 ± 1.18 | 23.48 ± 2.4  | 1.81 ± 0.68 |

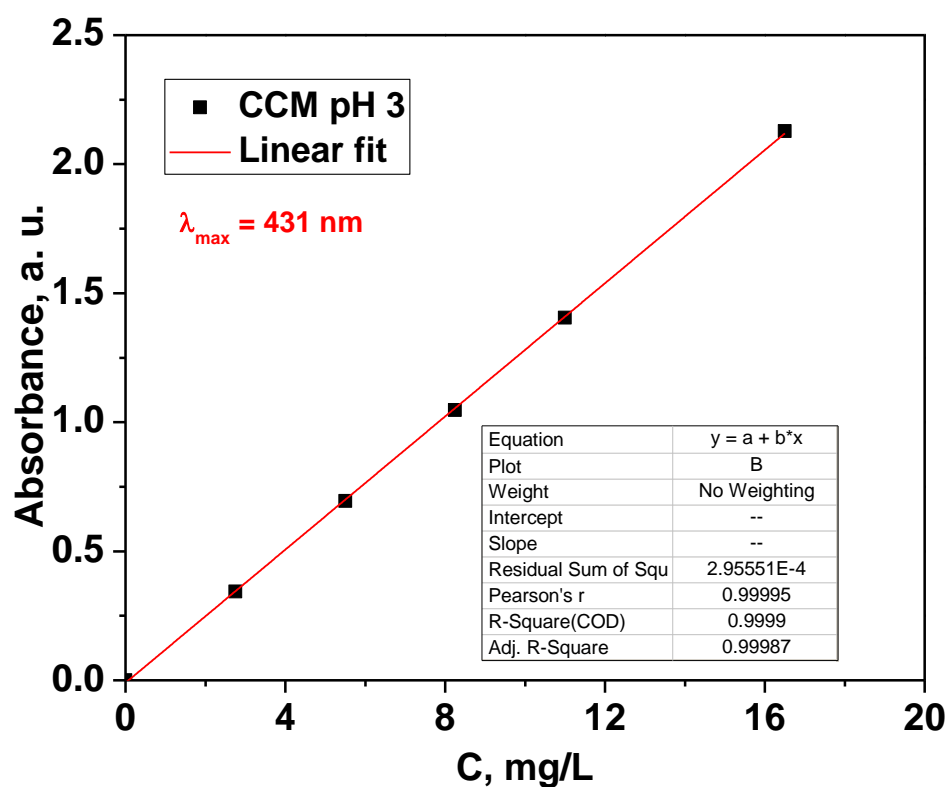

**Figure S3.** Calibration curve of CCM in ethanol: pH 3 aqueous solution, 50:50 (v/v).

**Table S2.** The mathematical formula of kinetic models.

| Kinetic model   | Mathematical formula                           |
|-----------------|------------------------------------------------|
| First-order     | $M_t = M_0 \cdot \exp^{-k_1 \cdot t}$          |
| Higuchi         | $M_t = k_t^{1/2}$                              |
| Korsmeyer-Pepas | $M_t/M_{\text{inf}} = k_{\text{KP}} \cdot t^n$ |
